# Supplementary material
Source: PubMed Central journal article supplement (PMC3432445)

Supplementary Figure 1

68 primary breast cancers with core biopsy taken at 24 hours post chemotherapy

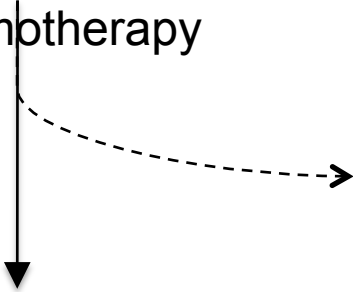

Excluded - not assessable for RAD51  
11 no proliferation in sections

57 cancers assessed for RAD51/geminin

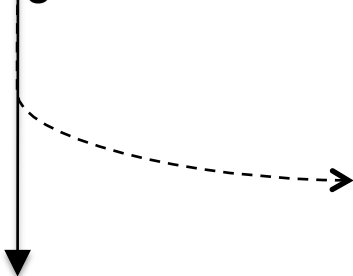

Excluded - no pathCR information  
8 Radiotherapy following neoadjuvant chemotherapy with no surgery  
1 Lost to followup

48 cancers assessed for correlation between RAD51 score and pathCR

Supplementary Figure 2

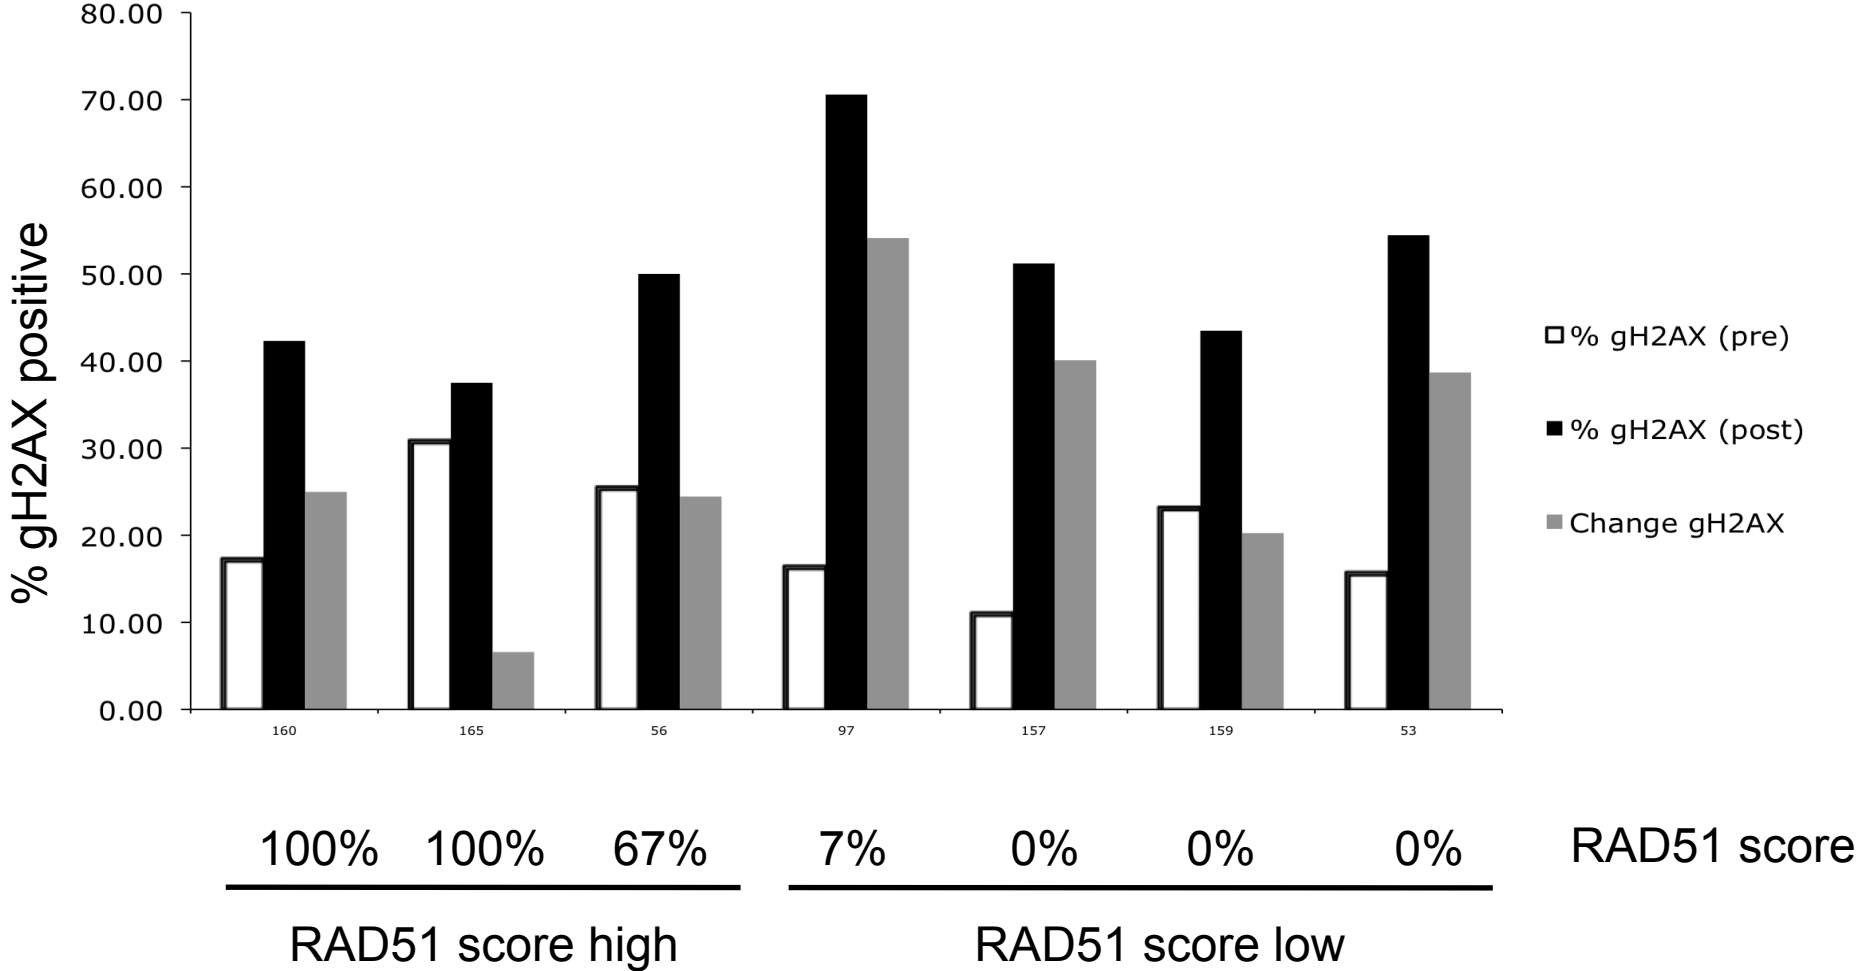

# Supplementary Figure 3

A

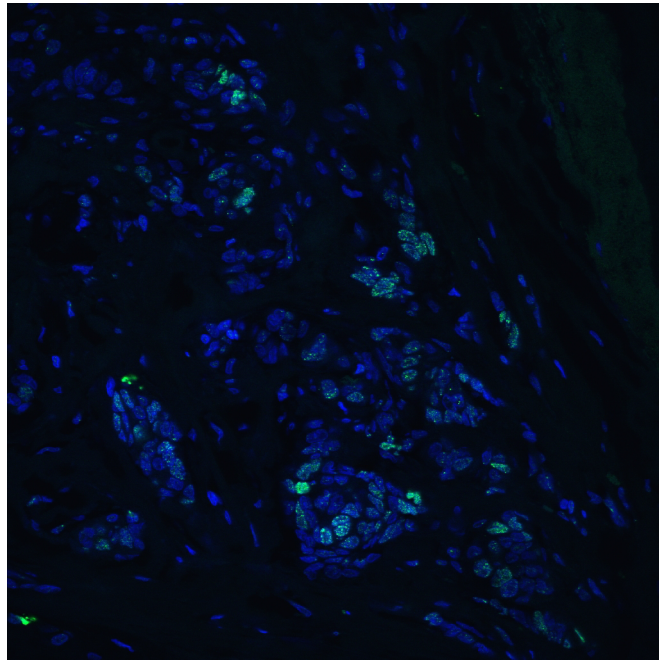

B

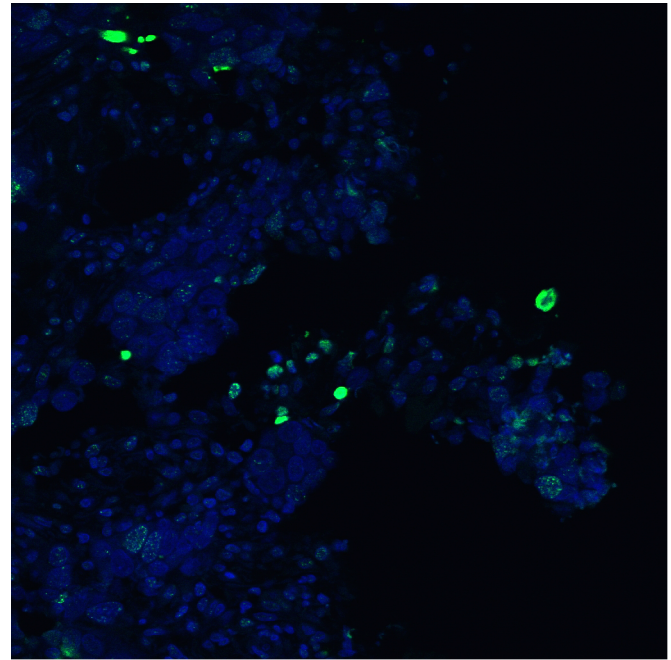

C

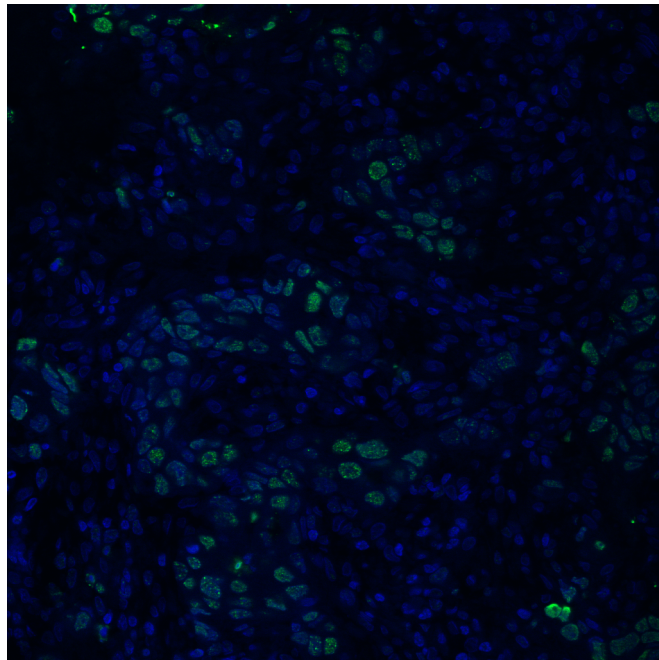

D

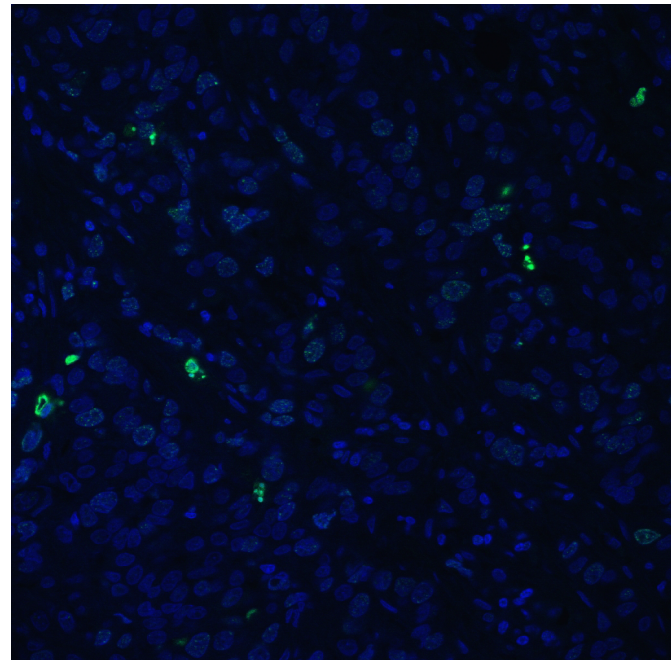

Supplement: NIHMS31833-supplement-2.pdf [file NIHMS31833-supplement-2.pdf]
